# Supplementary material for: The Bacterial Genomic Context of Highly Trimethoprim-Resistant DfrB Dihydrofolate Reductases Highlights an Emerging Threat to Public Health
Source: PubMed Central journal article supplement (PMC8103504; doi:10.3390/antibiotics10040433), 2021-04-13
Supplement: antibiotics-10-00433-s001.pdf [file antibiotics-10-00433-s001.pdf]

## Supporting Information

# **The genomic context of highly trimethoprim-resistant DfrB dihydrofolate reductases highlights an emerging threat to public health**

**Claudèle Lemay-St-Denis<sup>1,2,3</sup>, Sarah-Slim Diwan<sup>1,2,3</sup> and Joelle N. Pelletier<sup>1,2,3,4</sup>**

<sup>1</sup> Department of Biochemistry and Molecular Medicine, Université de Montréal, Montréal, Québec, Canada

<sup>2</sup> PROTEO, the Québec Network for Research on Protein, Function, Engineering and Applications, Qc, Canada

<sup>3</sup> CGCC, Center in Green Chemistry and Catalysis, Montréal H3A 0B8, Qc, Canada

<sup>4</sup> Chemistry Department, Université de Montréal, Montréal, Québec, Canada

**Table S1. Protein sequence identity of the ten members of the DfrB family <sup>a</sup>**

|        | DfrB1 | DfrB2 | DfrB3 | DfrB4 | DfrB5 | DfrB6 | DfrB7 | DfrB9 | DfrB10 | DfrB11 |
|--------|-------|-------|-------|-------|-------|-------|-------|-------|--------|--------|
| DfrB1  | 100%  | 78%   | 78%   | 77%   | 88%   | 87%   | 88%   | 77%   | 82%    | 78%    |
| DfrB2  | 17    | 100%  | 86%   | 74%   | 79%   | 82%   | 78%   | 84%   | 92%    | 88%    |
| DfrB3  | 17    | 11    | 100%  | 79%   | 82%   | 83%   | 79%   | 85%   | 92%    | 90%    |
| DfrB4  | 18    | 20    | 16    | 100%  | 77%   | 77%   | 76%   | 74%   | 77%    | 79%    |
| DfrB5  | 9     | 16    | 14    | 18    | 100%  | 91%   | 94%   | 77%   | 83%    | 81%    |
| DfrB6  | 10    | 14    | 13    | 18    | 7     | 100%  | 91%   | 79%   | 86%    | 83%    |
| DfrB7  | 9     | 17    | 16    | 19    | 5     | 7     | 100%  | 76%   | 82%    | 81%    |
| DfrB9  | 18    | 12    | 12    | 20    | 18    | 16    | 19    | 100%  | 88%    | 86%    |
| DfrB10 | 14    | 6     | 6     | 16    | 13    | 11    | 14    | 9     | 100%   | 92%    |
| DfrB11 | 17    | 9     | 8     | 18    | 15    | 13    | 15    | 11    | 6      | 100%   |

<sup>a</sup> Values in percentage correspond to protein sequence identity values; values in grey represent the number of mutations between sequences.

**Table S2. DfrB sequences**

| Gene         | Genbank ID   | Gene sequence                                                                                                                                                                                                                                                            | Protein sequence                                                                                      |
|--------------|--------------|--------------------------------------------------------------------------------------------------------------------------------------------------------------------------------------------------------------------------------------------------------------------------|-------------------------------------------------------------------------------------------------------|
| <i>dfrb1</i> | KAB1871659.1 | ATGGAACGAAGTAGCAATGAAGTCAGTAATC<br>CAGTTGCTGGCAATTTTGTATTCCCATCGAACG<br>CCACGTTTGGTATGGGAGATCGCGTGCGCAAG<br>AAATCCGGCGCCGCTGGCAAGGTCAGATTGT<br>CGGGTGGTACTGCACAAATTTGACCCCCGAAG<br>GCTACGCCGTCGAGTCTGAGGCTCACCCAGGC<br>TCAGTACAGATTTATCCTGTTGCGGCGCTTGA<br>ACGCATCAACTGA | MERSSNEVSNPV<br>AGNFVFPNATF<br>GMGDRVRKKSG<br>AAWQQQIVGW<br>YCTNLTPEGYAV<br>ESEAHPGSVQIY<br>PVAALERIN |
| <i>dfrb2</i> | FAA00064.1   | ATGGGTCAAAGTAGCGATGAAGCCAACGCTC<br>CCGTTGCAGGGCAGTTTGCCTTCCCCTGAGT<br>GCCACCTTTGGCTTAGGGGATCGCGTACGCAA<br>GAAATCTGGTCCGCTTGGCAGGGTCAAGTCG<br>TCGGTTGGTATTGCACAAAACCTCACTCCTGAA<br>GGCTATGCGGTCGAGTCCGAATCCCACCCAGG                                                       | MGQSSDEANAP<br>VAGQFALPLSAT<br>FGLGDRVRKKS<br>GAAWQQQVVG<br>WYCTKLTPGY<br>AVESESHPGSVQ<br>IYPVAALERVA |

|               |                         |                                                                                                                                                                                                                                                                           |                                                                                                                |
|---------------|-------------------------|---------------------------------------------------------------------------------------------------------------------------------------------------------------------------------------------------------------------------------------------------------------------------|----------------------------------------------------------------------------------------------------------------|
|               |                         | CTCAGTGCAAATTTATCCTGTGGCTGCACTTGA<br>ACGTGTGGCCTAA                                                                                                                                                                                                                        |                                                                                                                |
| <i>dfrb3</i>  | ACR57831.1              | ATGGACCAACACAACAATGGAGTCAGTACTC<br>TAGTTGCTGGCCAGTTTGCCTCCCATCGCAC<br>GCCACGTTTGGCCTGGGAGATCGCGTGCGCAA<br>GAAATCTGGCGCCGCTTGGCAGGGTCAAGTTG<br>TCGGGTGGTACTGCACAAAAGTACCCCTGAA<br>GGCTATGCCGTCGAGTCCGAGTCTACCCCGG<br>TTCAGTACAGATTTATCCTGTGGCTGCGCTTGA<br>ACGCGTGGCCTGA    | MDQHNNGVSTL<br>VAGQFALPSHA<br>TFGLGDRVRKKS<br>GAAWQGVVVG<br>WYCTKLTPEGY<br>AVESESHPGSVQ<br>IYPVAALERVA         |
| <i>dfrb4</i>  | ALF62656.1 <sup>a</sup> | ATGAATGAAGGAAAAAATGAGGTCAGTACTT<br>CAGCTGCTGGCCGGTTTCGATTCCCATCAAAC<br>GCCACGTTTGCCTTGGGGGATCGCGTACGCAA<br>GAAGTCTGGCGCTGCTTGGCAGGGGCGCATTG<br>TCGGGTGGTACTGCACAACACTTACCCCTGAA<br>GGCTACGCCGTCGAGTCCGAATCTACCCAGG<br>CTCAGTCCAGATTTATCCCATGACTGCGCTTG<br>AACGGGTGGCCTGA  | MNEGKNEVSTS<br>AAGRFAFSPNAT<br>FALGDRVRKKS<br>GAAWQGRIVG<br>WYCTTLTPEGYA<br>VESESHPGSVQIY<br>PMTALERVA         |
| <i>dfrb5</i>  | AAX46054.1              | ATGGACCAAGGCAGAAGTGAAGTCAGTAATC<br>CAGTTGCTGGCCAGTTTGCCTTCCCTTCAAAC<br>GCCGCGTTCGGAATGGGAGATCGCGTGCGCA<br>AGAAATCTGGCGCCGCTTGGCAAGGCCAGATT<br>GTCGGGTGGTACTGCACAAAATTGACCCCTGA<br>AGGGTACGCTGTGAGTCTGAGGCTCACCCCTG<br>GCTCGGTACAGATTTATCCTGTTGCGGCACTG<br>GAACGCATCAACTGA | MDQGRSEVSNP<br>VAGQFAPSNA<br>AFMGDRVRKKS<br>SGAAWQGQIVG<br>WYCTKLTPEGY<br>AVESEAHPGSV<br>QIYPVAALERIN          |
| <i>dfrb6</i>  | ADO00942.1              | ATGGACCAAGGTAGCAATGAAGTCATTAATC<br>CAGTCGCTGGCCAGTTTGCCTCCCATCGAAC<br>GCCACGTTTGGTATGGGAGATCGCGTGCGCAA<br>GAAATCTGGCGCCGCTTGGCAAGGTCAGATTG<br>TCGGGTGGTACAGCACAAGTTGACCCCTGA<br>AGGCTACGCTGTGAGTCTGAGGCTCACCCCTG<br>GCTCGGTACAGATTTATCCTGTTGCCGCGCTTG<br>AACCGTCAACTGA    | MDQGSNEVINP<br>VAGQFASPSNA<br>TFMGDRVRKKS<br>SGAAWQGQIVG<br>WYSTKLTPEGYA<br>VESEAHPGSVQI<br>YPVAALERN          |
| <i>dfrb7</i>  | ADB54781.1              | ATGGACCAAGGTAGCAATGAAGTCGGTAATC<br>CAGTTGCGGGCCAGTTTTCGTTCCCATCGAAC<br>GCCGCGTTTAGTATGGGAGATCGCGTGCGCAA<br>GAAATCGGGCGCCGCTTGGCAAGGTCAGATT<br>GTCGGGTGGTACTGCACAAAAGTTGACCCCTGA<br>AGGCTACGCTGTGAGTCTGAGGCTCACCCCTG<br>GCTCGGTACAGATTTATCCTGTTGCCGCGCTTG<br>AACCGTCAACTGA | MDQGSNEVGNP<br>VAGQFSFSPNAA<br>FSMGDRVRKKS<br>GAAWQGVVVG<br>WYCTKLTPEGY<br>AVESEAHPGSV<br>QIYPVAALERIN<br>GVQG |
| <i>dfrb9</i>  | AGM20434.1              | ATGAATCAAAGTAGCAATTGCATCAGCACTCC<br>AGTTGTTGGACAGTTTGCCTGCCATTTCAACC<br>CACGTTCCGCTGGGAGATCGCGTACGCAAG<br>AAGTCTGGCGCCGCTTGGCAAGGTAAGTTGT<br>CGGCTGGTACTGCACAAAATTAACCCCTGAAG<br>GCTACGCGTTCGAGTCCGAAGCTCATCCAGGC<br>TCAGTGCAGATTTATCCTGTGGCTGCGCTTGA<br>ACGCGTGGCCTAA    | MNQSSNCISTPV<br>VGQFALPFQPTF<br>GLGDRVRKKS<br>AAWQGVVVG<br>YCTKLTPEGYAV<br>ESEAHPGSVQIY<br>PVAALERVA           |
| <i>dfrb10</i> | ALZ46148.1              | ATGGATCAAAGTAGCAATGAAGTCAGCACTC<br>CAGTTGCTGGCCAGTTTGCCTCCCATTGCGC                                                                                                                                                                                                        | MDQSSNEVSTPV<br>AGQFALPLRATF                                                                                   |

|               |            |                                                                                                                                                                                                                                                                         |                                                                                                        |
|---------------|------------|-------------------------------------------------------------------------------------------------------------------------------------------------------------------------------------------------------------------------------------------------------------------------|--------------------------------------------------------------------------------------------------------|
|               |            | GCCACGTTTGGCCTGGGAGATCGCGTACGCAA<br>GAAATCTGGCGCCGCTTGGCAAGGTCAAGTTG<br>TCGGCTGGTACTGCACAAAAGTACCCCTGAA<br>GGCTATGCAGTCGAGTCCGAGTCTACCCAGG<br>CTCAGTACAGATTTATCCTGTGGCTGCGCTTGA<br>ACGCGTGGCCTAA                                                                        | GLGDRVRRKKS<br>AAWQGVVGV<br>YCTKLTPEGYAV<br>ESESHPGSVQIYP<br>VAALERVA                                  |
| <i>dfrb11</i> | PKO69073.1 | ATGGATCAAAGTAGTAAAGAGGTTGGCACTC<br>CCGTTGTTGGCCAGTTTGCCTCCCGTTCGCAC<br>GCCACGTTTGGCCTTGGAGACCGCGTTCGCAA<br>GAAATCGGGCGCCGCTTGGCAGGGTCAAGTT<br>GTGGGCTGGTATTGCACAAAGCTGACCCCTGA<br>AGGCTATGCCGTCGAGTCCGAGTCTACCCAG<br>GCTCGGTACAAATTTATCCAGTGAATGCGCTT<br>GAACCGTGGCCTGA | MDQSSKEVGT<br>VVGQFALPSHA<br>TFGLGDRVRRKKS<br>GAAWQGVVGV<br>WYCTKLTPEGY<br>AVESESHPGSVQ<br>IYPVNALERVA |

<sup>a</sup> This sequence differs from CARD's reference sequence ABY55281.1 at the highlighted region (here Gly instead of Asp). Since we previously characterized DfrB4 using ALF62656.1 sequence [1], we used it in this study.

1. Toulouse, J.L.; Shi, G.; Lemay-St-Denis, C.; Ebert, M.C.C.J.C.; Deon, D.; Gagnon, M.; Ruediger, E.; Saint-Jacques, K.; Forge, D.; Vanden Eynde, J.J.; et al. Dual-Target Inhibitors of the Folate Pathway Inhibit Intrinsically Trimethoprim-Resistant DfrB Dihydrofolate Reductases. *ACS Med. Chem. Lett.* **2020**, acsmedchemlett.0c00393, doi:10.1021/acsmchemlett.0c00393.
